# Supplementary material for: Video Images about Decisions for Ethical Outcomes in Kidney Disease (VIDEO-KD): the study protocol for a multi-centre randomised controlled trial
Source: HighWire-hosted journal article supplement (doi:10.1136/bmjopen-2021-059313), 2022-04-01
Supplement: bmjopen-2021-059313supp002_data_supplement.pdf [file bmjopen-2021-059313supp002_data_supplement.pdf]

**Supplementary Material: Video Declaration Script for Research Assistant**

As you make the video, please use the following instructions and questions as a guide:

1. If you wish, introduce yourself. You may use your full name, first name, or any other manner in which you refer to yourself.
  - a. If Yes, let the subject introduce themselves.
  - b. If No, move to next question.
2. What has your kidney doctor said to you about your kidney health? Did they seem worried about your kidneys?
3. Given what you understand about your illness, what's most important to you right now?  
By the way, please re-state the question as you give your answer, for example, you could start with: 'what's most important to me is...'
  - a. After subject responds, state "What other things are most important to you?" and then let subject respond and move to next question.
  - b. For one word or very limited responses, like 'family', ask a probing question, e.g., How is <family> important to you?
4. As you think about the future, what worries you?
5. Some people find it helpful to understand their choices for medical care in terms of balancing quality of life (living as well as you can) vs. quantity of life (living as long as possible even if it means being in the hospital). What is important to you as you make medical decisions?

6. At this point, what do you think are the best next steps in treating your kidney disease?

What do you think about these choices: medical management without dialysis, peritoneal dialysis, hemodialysis.

a. If patient does not understand the options or asks for an explanation, ask “Would you like to watch the video again? We can stop the video along the way so you can ask questions. Or would you like me to describe the options for you?”

7. What kinds of information would you like to know in order to make the best decision for you?

8. If you became very sick, are there any specific medical treatments that you would or would not wish to receive, and why? Please think about whether you would choose to receive CPR if your heart stopped beating or have a breathing tube placed if you stopped breathing.

9. Please talk about how your faith or spirituality affects how you think about medical decisions toward the end of life, or whatever else affects how you think about medical decisions. Some examples in addition to faith and spirituality may include family, upbringing or personal experiences with end of life.

a. For very limited responses, like ‘my faith is important’, ask a probing question, e.g., How is your faith important to you? Can you give me some examples?

10. Anything else you would like to say?
